# Supplementary material for: A Case Report of Fulminant Type 1 Diabetes Mellitus Caused by Drug Reaction with Eosinophilia and Systemic Symptoms (DRESS) Complicated by Iodine-Induced Thyrotoxicosis
Source: Springer Nature journal article supplement (doi:10.1007/s13300-019-0607-5), 2019-04-01
Supplement: MOESM1 [file 16599738]

## Supplementary materials

Table 1. Screening tests for infection and autoimmune diseases.

|                     | Test                                                                            | Result                  |
|---------------------|---------------------------------------------------------------------------------|-------------------------|
| Infection           | Antigen of influenza A (Flu A-Ag)                                               | Negative                |
|                     | IgM against Chlamydia pneumoniae (CP-IgM)                                       | Negative                |
|                     | CMV IgM                                                                         | Negative                |
|                     | IgM against Mycoplasma pneumoniae (MP-IgM)                                      | Negative                |
|                     | Brucella agglutination test                                                     | Negative                |
|                     | Anti streptolysin (ASO)                                                         | Negative                |
|                     | G test and GM test                                                              | Negative                |
|                     | Urine culture and stool culture                                                 | Negative                |
|                     | Blood screening test (HIV IgG, RPR, HCV IgG, HBsAg, HBsAb, HBcAg, HBeAg, HBeAb) | Only HbsAb was positive |
| Autoimmune diseases | Autoantibody                                                                    | Negative                |
|                     | Anti-extractable nuclear antigen antibody (ENA)                                 | Negative                |
|                     | ANCA (IF-ANCA, PR3-ANCA, MPO-ANCA)                                              | Negative                |

Table 2. Genes screening for diabetes melitus panel

| Official name                                                     | Phenotype | Inheritance |
|-------------------------------------------------------------------|-----------|-------------|
| MODY type 1                                                       | HNF4A     | AD          |
| MODY type 2                                                       | GCK       | AD          |
| MODY type 3                                                       | HNF1A     | AD          |
| MODY type 4                                                       | PDX1      | AD          |
| MODY type 5                                                       | HNF1B     | AD          |
| MODY type 6                                                       | NEUROD1   | AD          |
| MODY type 7                                                       | KLF11     | AD          |
| MODY type 8                                                       | CEL       | AD          |
| MODY type 9                                                       | PAX4      | AD          |
| MODY type 10                                                      | INS       | AD          |
| MODY type 11                                                      | BLK       | AD          |
| MODY type 12                                                      | ABCC8     | -           |
| MODY type 13                                                      | KCNJ11    | AD          |
| MODY type 14                                                      | APPL1     | AD          |
| Diabetes mellitus, permanent neonatal                             | GCK       | AD          |
|                                                                   | INS       | AD          |
|                                                                   | ABCC8     | AD          |
| Diabetes, permanent neonatal, with or without neurologic features | KCNJ11    | AD          |
| Diabetes mellitus, transient neonatal                             | ZFP57     | -           |
| Microcephaly, epilepsy, and diabetes syndrome                     | IER3IP1   | AR          |
| Wolcott-Rallison syndrome                                         | EIF2AK3   | AR          |
| Fanconi-Bickel syndrome                                           | SLC2A2    | AR          |
| Diabetes mellitus, insulin-resistant, with acanthosis nigricans   | INSR      | AR          |
| Thiamine-responsive megaloblastic anemia syndrome                 | SLC19A2   | AR          |
| Rabson-Mendenhall syndrome                                        | INSR      | AR          |

|                                                                           |         |       |
|---------------------------------------------------------------------------|---------|-------|
| Wolfram syndrome                                                          | WFS1    | AR    |
| Immunodysregulation, polyendocrinopathy, and enteropathy, X-linked        | FOXP3   | XLR   |
| Histiocytosis-lymphadenopathy plus syndrome                               | SLC29A3 | AR    |
| Pancreatic agenesis and congenital heart defects                          | GATA6   | AD    |
| Lymphedema-distichiasis syndrome with renal disease and diabetes mellitus | FOXC2   | AD    |
| Fanconi renotubular syndrome 4, with maturity-onset diabetes of the young | HNF4A   | AD    |
| Renal cysts and diabetes syndrome                                         | HNF1B   | AD    |
| Abdominal obesity-metabolic syndrome 3                                    | DYRK1B  | AD    |
| Lipodystrophy, familial partial, type 2                                   | LMNA    | AD    |
| Lipodystrophy, familial partial, type 3                                   | PPARG   | AD    |
| Lipodystrophy, familial partial, type 4                                   | PLIN1   | AD    |
| Lipodystrophy, familial partial, type 5                                   | CIDEA   | AR    |
| Lipodystrophy, familial partial, type 6                                   | LIPE    | AR    |
| Lipodystrophy, congenital generalized, type 2                             | BSCL2   | AR    |
| Lipodystrophy, congenital generalized, type 1                             | AGPAT2  | AR    |
| Lipodystrophy, congenital generalized, type 3                             | CAV1    | AR    |
| Lipodystrophy, congenital generalized, type 4                             | PTRF    | AR    |
| Werner syndrome                                                           | WRN     | AR    |
| Bardet-Biedl syndrome 1, modifier of                                      | CCDC28B | AR,AD |
| Bardet-Biedl syndrome 1, modifier of                                      | ARL6    | AR,AD |
| Bardet-Biedl syndrome 1                                                   | BBS1    | AR,DR |
| Bardet-Biedl syndrome 2                                                   | BBS2    | AR    |
| Bardet-Biedl syndrome 3                                                   | ARL6    | AR    |
| Bardet-Biedl syndrome 4                                                   | BBS4    | AR    |
| Bardet-Biedl syndrome 5                                                   | BBS5    | AR    |
| Bardet-Biedl syndrome 6                                                   | MKKS    | AR    |

|                                                                                                   |         |       |
|---------------------------------------------------------------------------------------------------|---------|-------|
| Bardet-Biedl syndrome 7                                                                           | BBS7    | AR    |
| Bardet-Biedl syndrome 8                                                                           | TTC8    | AR    |
| Bardet-Biedl syndrome 9                                                                           | BBS9    | AR    |
| Bardet-Biedl syndrome 10                                                                          | BBS10   | AR    |
| Bardet-Biedl syndrome 11                                                                          | TRIM32  | AR    |
| Bardet-Biedl syndrome 12                                                                          | BBS12   | AR    |
| Bardet-Biedl syndrome 13                                                                          | MKS1    | AR    |
| Bardet-Biedl syndrome 14, modifier of                                                             | TMEM67  | AR    |
| Bardet-Biedl syndrome 14                                                                          | CEP290  | AR    |
| Bardet-Biedl syndrome 15                                                                          | WDPCP   | AR    |
| Bardet-Biedl syndrome 16                                                                          | SDCCAG8 | AR    |
| Bardet-Biedl syndrome 17                                                                          | LZTFL1  | AR    |
| Bardet-Biedl syndrome 18                                                                          | BBIP1   | AR    |
| Bardet-Biedl syndrome 19                                                                          | IFT27   | AR    |
| Bardet-Biedl syndrome 20                                                                          | IFT74   | AR    |
| Bardet-Biedl syndrome 21                                                                          | C8orf37 | AR    |
| Alstrom syndrome                                                                                  | ALMS1   | AR    |
| Microcephaly, short stature, and impaired glucose metabolism 1                                    | TRMT10A | AR    |
| Insulin-like growth factor I, resistance to                                                       | IGF1R   | AD/AR |
| Diabetes mellitus, insulin-resistant, with acanthosis nigricans TYPE A/Rabson-Mendenhall syndrome | INSR    | AR    |
| Diabetes, type 2, susceptibility to                                                               | GPD2    | AD    |
| Diabetes mellitus, noninsulin-dependent                                                           | NEUROD1 | AD    |
| Diabetes mellitus, noninsulin-dependent                                                           | IRS1    | AD    |
| Diabetes, type 2                                                                                  | PPARG   | AD    |
| Diabetes mellitus, noninsulin-dependent                                                           | SLC2A2  | AD    |
| Diabetes mellitus, noninsulin-dependent, susceptibility to                                        | IGF2BP2 | AD    |

|                                                                                                                        |          |        |
|------------------------------------------------------------------------------------------------------------------------|----------|--------|
| Diabetes mellitus, noninsulin-dependent, association with                                                              | WFS1     | AD     |
| Diabetes mellitus, noninsulin-dependent                                                                                | NIDDM4   | AD     |
| Diabetes mellitus, noninsulin-dependent, susceptibility to                                                             | CDKAL1   | AD     |
|                                                                                                                        | HMGA1    | AD     |
|                                                                                                                        | ENPP1    | AD     |
| Diabetes mellitus, noninsulin-dependent, late onset/Hyperinsulinemic hypoglycemia, familial, 3                         | GCK      | AD     |
| Insulin resistance, severe, digenic                                                                                    | PPP1R3A  | AD     |
| Diabetes mellitus, type 2                                                                                              | PAX4     | AD     |
| Diabetes mellitus, noninsulin-dependent, susceptibility to                                                             | SLC30A8  | AD     |
| Diabetes mellitus, type 2, susceptibility to                                                                           | TCF7L2   | AD     |
| Diabetes mellitus, type 2, susceptibility to/Hyperinsulinemic hypoglycemia, familial, 2                                | KCNJ11   | AD     |
| Diabetes mellitus, noninsulin-dependent                                                                                | ABCC8    | AD     |
| Diabetes mellitus, noninsulin-dependent                                                                                | MAPK8IP1 | AD     |
| Diabetes mellitus, type 2, susceptibility to                                                                           | MTNR1B   | AD     |
| Diabetes mellitus, noninsulin-dependent, 2                                                                             | HNF1A    | AD     |
| Diabetes mellitus, type II, susceptibility to                                                                          | PDX1     | AD     |
| Diabetes mellitus, noninsulin-dependent                                                                                | IRS2     | AD     |
| Diabetes mellitus, noninsulin-dependent                                                                                | LIPC     | AD     |
| Diabetes mellitus, noninsulin-dependent                                                                                | HNF1B    | AD     |
| Diabetes mellitus, noninsulin-dependent                                                                                | GCGR     | AD     |
| Hypertension, insulin resistance-related, susceptibility to/Diabetes mellitus, noninsulin-dependent, susceptibility to | RETN     | AD     |
| Diabetes mellitus, type II                                                                                             | AKT2     | AD     |
| Diabetes mellitus, noninsulin-dependent                                                                                | NIDDM3   | AD     |
|                                                                                                                        | HNF4A    | AD     |
| Insulin resistance, susceptibility to                                                                                  | PTPN1    | AD     |
| Hyperinsulinemic hypoglycemia, familial, 1                                                                             | ABCC8    | AD, AR |

|                                                                                               |         |    |
|-----------------------------------------------------------------------------------------------|---------|----|
| Hyperinsulinemic hypoglycemia, familial, 2                                                    | KCNJ11  | AR |
| Hyperinsulinemic hypoglycemia, familial, 3                                                    | GCK     | AD |
| Hyperinsulinemic hypoglycemia, familial, 4                                                    | HADH    | AR |
| Hyperinsulinemic hypoglycemia, familial, 5                                                    | INSR    | AD |
| Hyperinsulinemic hypoglycemia, familial, 6                                                    | GLUD1   | AD |
| Hyperinsulinemic hypoglycemia, familial, 7                                                    | SLC16A1 | AD |
| AD: autosomal dominant AR: autosomal recessive XLR: X-linked recessive XLD: X-linked dominant |         |    |

A CHI Next-generation sequencing (NGS) analysis retrieved a total of 107 genes (mutations related to monogenic DM). The identified mutations were validated using direct sequencing on an ABI 3730XL DNA Analyzer (Applied Biosystems, Foster City, CA, USA). The sequences were compared to the reference genomic GCK sequence ([https://www.ncbi.nlm.nih.gov/nucore/NM\\_000162.4](https://www.ncbi.nlm.nih.gov/nucore/NM_000162.4)) using the Human BLAT Search online of University of California Santa Cruz (UCSC) ([http:// genome.ucsc.edu/cgi-bin/hgBlat](http://genome.ucsc.edu/cgi-bin/hgBlat)). The bioinformatics prediction systems (SIFT and Polyphen2) provided controversial results for the pathogenicity of the missense mutations. The Single Nucleotide Polymorphism Database (dbSNP) and the Human Gene Mutation Database (HGMD) were used to determine the novelty of the identified variant.

Table 3. HLA subtype

|          | Allele 1 | Allele 2 |
|----------|----------|----------|
| HLA_A    | 11:01    | 29:01    |
| HLA_B    | 07:05    | 52:01    |
| HLA_C    | 12:02    | 15:05    |
| HLA_DRB1 | 12:02    | 14:01    |
| HLA_DQB1 | 05:02    | 03:01    |

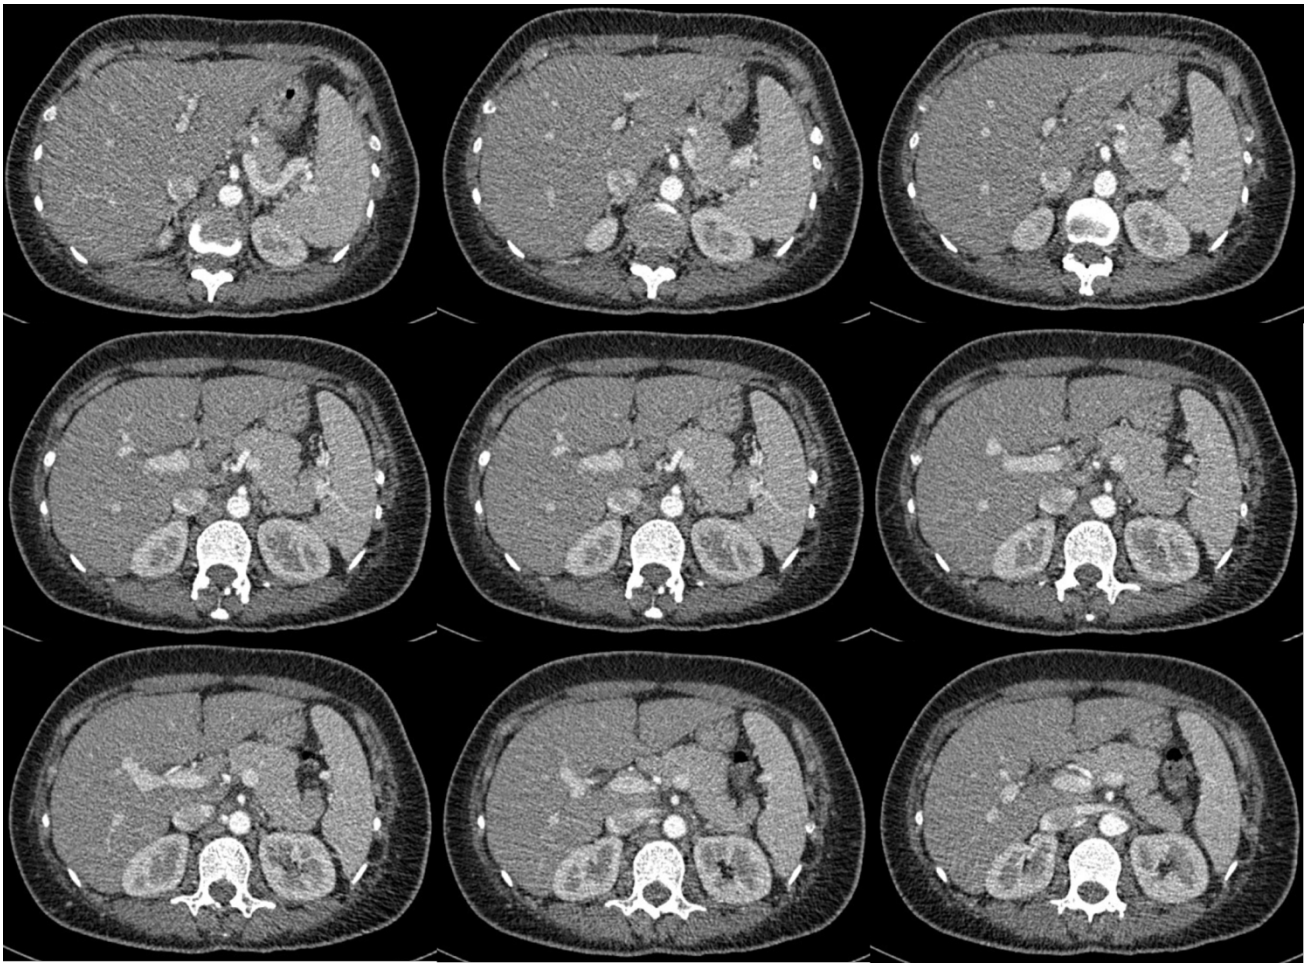

Figure 1. Pancreas on enhanced CT. Enhanced CT showed that the size and shape of the pancreas were normal, the edges were clear, the parenchyma density were uniform, and the pancreatic duct had no obvious expansion.

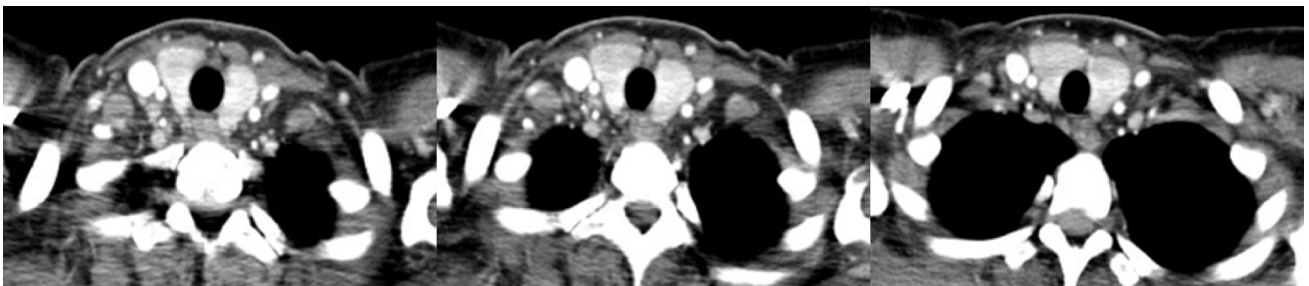

Figure 2. Thyroid on enhanced CT. There were no nodules within the thyroid.

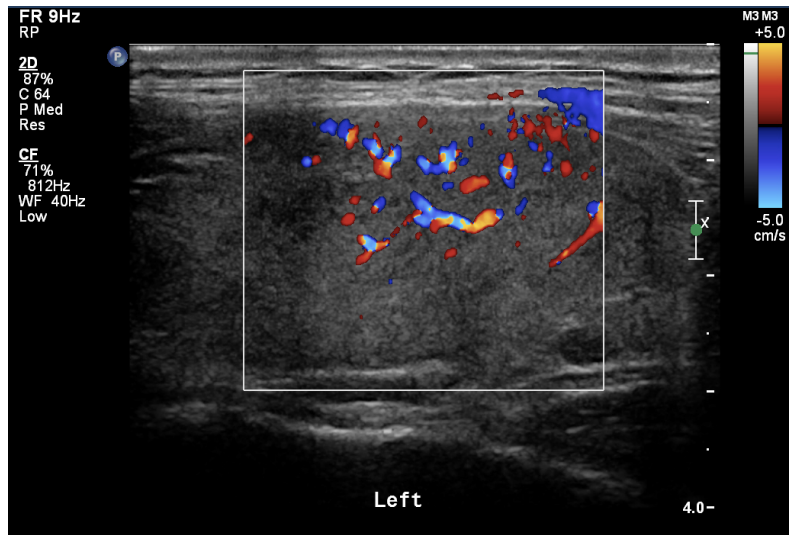

Figure 3. Thyroid ultrasonography. There were no nodules within the thyroid, CDFI demonstrated slightly abundant flow signal.
